# Supplementary material for: Muscle Tissue Damage Induced by the Venom of Bothrops asper: Identification of Early and Late Pathological Events through Proteomic Analysis
Source: PLOS journal article supplement (doi:10.1371/journal.pntd.0004599), 2016-04-01
Supplement: S3 (10.1371/journal.pntd.0004599.s003) [file journal.pntd.0004599.s003]

**S3 Table. Membrane proteins identified in wound exudates collected from mice at 1, 6 and 24 h after injection of *B. asper* venom.**

| Protein                                                                                    | Accession Number | Molecular Weight | Quantitative Value |     |      |
|--------------------------------------------------------------------------------------------|------------------|------------------|--------------------|-----|------|
|                                                                                            |                  |                  | 1 h                | 6 h | 24 h |
| Proteins which changed at least three-fold at one time as compared to another time         |                  |                  |                    |     |      |
| Macrophage colony-stimulating factor 1 receptor                                            | P09581           | 109 kDa          | 83                 | 56  | 11   |
| Angiotensin-converting enzyme                                                              | P09470           | 151 kDa          | 28                 | 22  | 0    |
| Ryanodine receptor 1                                                                       | E9PZQ0           | 565 kDa          | 19                 | 45  | 0    |
| Epidermal growth factor receptor                                                           | Q01279           | 135 kDa          | 17                 | 24  | 92   |
| Cadherin-1                                                                                 | P09803           | 98 kDa           | 0                  | 22  | 0    |
| Prolow-density lipoprotein receptor-related protein 1                                      | Q91ZX7           | 505 kDa          | 0                  | 34  | 46   |
| Transient receptor potential cation channel subfamily M member 2                           | Q5KTC0           | 172 kDa          | 0                  | 0   | 23   |
| Proteins which did not change more than three-fold at any time as compared to another time |                  |                  |                    |     |      |
| ATP-binding cassette sub-family A member 8-B                                               | Q8K440           | 183 kDa          | 93                 | 45  | 57   |
| Interleukin-1 receptor accessory protein                                                   | Q3UVZ1           | 79 kDa           | 37                 | 22  | 23   |
| Leukemia inhibitory factor receptor                                                        | P42703 [2]       | 123 kDa          | 33                 | 25  | 42   |
| H-2 class I histocompatibility antigen, D-K alpha chain                                    | P14426           | 41 kDa           | 19                 | 22  | 11   |
| H-2 class I histocompatibility antigen, Q10 alpha chain                                    | P01898 [5]       | 37 kDa           | 18                 | 24  | 14   |
| Transferrin receptor protein 1                                                             | Q62351           | 86 kDa           | 12                 | 15  | 23   |
