# Supplementary material for: Muscle Tissue Damage Induced by the Venom of Bothrops asper: Identification of Early and Late Pathological Events through Proteomic Analysis
Source: PLOS journal article supplement (doi:10.1371/journal.pntd.0004599), 2016-04-01
Supplement: S4 (10.1371/journal.pntd.0004599.s004) [file journal.pntd.0004599.s004]

**S4 Table. Coagulation factors identified in wound exudates collected from mice at 1, 6 and 24 h after injection of *B. asper* venom.**

| Protein                                                                                    | Accession Number | Molecular Mass | Quantitative Value |     |      |
|--------------------------------------------------------------------------------------------|------------------|----------------|--------------------|-----|------|
|                                                                                            |                  |                | 1 h                | 6 h | 24 h |
| Proteins which changed at least three-fold at one time as compared to another time         |                  |                |                    |     |      |
| Coagulation factor XII                                                                     | Q80YC5           | 66 kDa         | 65                 | 22  | 69   |
| Coagulation factor X                                                                       | O88947           | 54 kDa         | 28                 | 0   | 11   |
| Fibrinogen beta chain                                                                      | Q8K0E8           | 55 kDa         | 13                 | 66  | 108  |
| Coagulation factor XIII B chain                                                            | Q07968           | 76 kDa         | 1                  | 11  | 0    |
| Proteins which did not change more than three-fold at any time as compared to another time |                  |                |                    |     |      |
| C4b-binding protein                                                                        | P08607           | 52 kDa         | 65                 | 34  | 23   |
| von Willebrand factor (Fragment)                                                           | S4R195 [2]       | 42 kDa         | 65                 | 90  | 46   |
| Prothrombin                                                                                | P19221           | 70 kDa         | 54                 | 19  | 21   |
| Fibrinogen gamma chain                                                                     | Q8VCM7           | 49 kDa         | 50                 | 118 | 145  |
| Coagulation factor V                                                                       | O88783           | 247 kDa        | 28                 | 11  | 23   |
| Coagulation factor XIII A chain                                                            | Q8BH61           | 83 kDa         | 28                 | 22  | 11   |
